# Supplementary material for: Delivering a medical school elective with massive open online course (MOOC) technology
Source: PeerJ. 2016 Aug 11;4:e2343. doi: 10.7717/peerj.2343 (PMC4991885; doi:10.7717/peerj.2343)
Supplement: Supplemental Information 1 [file peerj-04-2343-s001.xlsx]

## Sheet: EffectiveTeacher
AY	MOOC	ET
2015	1	5
2015	1	5
2015	1	5
2015	1	5
2015	1	5
2015	1	5
2015	1	5
2015	1	5
2015	1	5
2015	1	5
2015	1	5
2015	1	5
2015	1	5
2015	1	5
2015	1	5
2015	1	5
2015	1	5
2015	1	5
2015	1	4
2014	0	5
2014	0	5
2014	0	5
2014	0	5
2014	0	5
2014	0	5
2013	0	5
2013	0	5
2013	0	5
2013	0	5
2013	0	5
2013	0	5
2013	0	5
2012	0	5
2012	0	5
2012	0	5
2012	0	5
2012	0	5
2012	0	5
2012	0	4
2012	0	4

## Sheet: Recomend
AY	MOOC	RO
2015	1	5
2015	1	5
2015	1	5
2015	1	5
2015	1	5
2015	1	5
2015	1	5
2015	1	5
2015	1	5
2015	1	5
2015	1	5
2015	1	5
2015	1	5
2015	1	5
2015	1	5
2015	1	5
2015	1	5
2015	1	5
2015	1	4
2014	0	5
2014	0	5
2014	0	5
2014	0	5
2014	0	5
2014	0	5
2013	0	5
2013	0	5
2013	0	5
2013	0	5
2013	0	5
2013	0	5
2013	0	5
2012	0	5
2012	0	5
2012	0	5
2012	0	4
2012	0	4
2012	0	4
2012	0	4
2012	0	3

## Sheet: Overall
AY	MOOC	Overall
2015	1	5
2015	1	5
2015	1	5
2015	1	5
2015	1	5
2015	1	5
2015	1	5
2015	1	5
2015	1	5
2015	1	5
2015	1	5
2015	1	5
2015	1	5
2015	1	5
2015	1	5
2015	1	5
2015	1	5
2015	1	5
2015	1	4
2014	0	5
2014	0	5
2014	0	5
2014	0	5
2014	0	5
2014	0	5
2013	0	5
2013	0	5
2013	0	5
2013	0	5
2013	0	5
2013	0	5
2013	0	5
2012	0	5
2012	0	5
2012	0	5
2012	0	5
2012	0	5
2012	0	4
2012	0	4
2012	0	3

## Sheet: CourseObjectives
AY	MOOC	COA
2015	1	5
2015	1	5
2015	1	5
2015	1	5
2015	1	5
2015	1	5
2015	1	5
2015	1	5
2015	1	5
2015	1	5
2015	1	5
2015	1	5
2015	1	5
2015	1	5
2015	1	5
2015	1	5
2015	1	5
2015	1	5
2015	1	4
2014	0	*
2014	0	5
2014	0	5
2014	0	5
2014	0	5
2014	0	5
2013	0	5
2013	0	5
2013	0	5
2013	0	5
2013	0	5
2013	0	5
2013	0	5
2012	0	5
2012	0	5
2012	0	5
2012	0	4
2012	0	4
2012	0	4
2012	0	4
2012	0	3

## Sheet: PersonalObjectives
AY	MOOC	PLO
2015	1	5
2015	1	5
2015	1	5
2015	1	5
2015	1	5
2015	1	5
2015	1	5
2015	1	5
2015	1	5
2015	1	5
2015	1	5
2015	1	5
2015	1	5
2015	1	5
2015	1	5
2015	1	5
2015	1	5
2015	1	5
2015	1	4
2014	0	*
2014	0	5
2014	0	5
2014	0	5
2014	0	5
2014	0	5
2013	0	5
2013	0	5
2013	0	5
2013	0	5
2013	0	5
2013	0	5
2013	0	5
2012	0	5
2012	0	5
2012	0	5
2012	0	5
2012	0	4
2012	0	4
2012	0	4
2012	0	3
